# Supplementary material
Source: ML conference proceedings conference paper supplement (https://aclanthology.org/2022.insights-1.20)
Supplement: OptionalSupplementarySoftware [file Link_to_data.pdf › Link_to_data.pdf]

**Link to data:** [https://drive.google.com/file/d/1Nj\\_u1yfPc518j42KNtGCS-0ygGvdGsNU/view?usp=sharing](https://drive.google.com/file/d/1Nj_u1yfPc518j42KNtGCS-0ygGvdGsNU/view?usp=sharing)

**We put data in this anonymous drive due to size limit.**
